# Supplementary material for: Molecular evolution of HR, a gene that regulates the postnatal cycle of the hair follicle
Source: PubMed Central journal article supplement — Sci Rep. 2011 Jul 6;1:32. doi: 10.1038/srep00032 (PMC3216519; doi:10.1038/srep00032), 2011-07-06
Supplement: srep00032-s2.pdf [file srep00032-s2.pdf]

## Molecular evolution of *HR*, a gene that regulates the postnatal cycle of the hair follicle

Amir Ali Abbasi

**Supplementary Table: DNA sequence variations in human *HR*.**

| SNP | dbSNP Number (build 131) | Coding exon ( <i>HR</i> ) | Position (GRCh37) | Nucleotide change | Validation                                       |
|-----|--------------------------|---------------------------|-------------------|-------------------|--------------------------------------------------|
| 1   | rs77620102               | 1                         | 21986657-21986657 | C to T            | by-cluster,by-frequency,by-1000genomes           |
| 2   | rs73549525               | 1                         | 21986496-21986496 | G (P) to C(R)     | by-cluster,by-frequency,by-1000genomes           |
| 3   | rs12679538               | 1                         | 21986395-21986395 | G (L) to T (M)    | by-cluster,by-frequency,by-hapmap                |
| 4   | rs79783229               | 2                         | 21985226-21985226 | G to A            | by-1000genomes                                   |
| 5   | rs77758962               | 2                         | 21984999-21984999 | G (P) to A (L)    | by-cluster,by-frequency,by-1000genomes           |
| 6   | rs12675375               | 2                         | 21984945-21984945 | C(G) to T(D)      | by-cluster,by-frequency,by-hapmap,by-1000genomes |
| 7   | rs73549523               | 2                         | 21984765-21984765 | C (C) to T (Y)    | by-cluster,by-frequency,by-1000genomes           |
| 8   | rs12675745               | 2                         | 21984650-21984650 | A to G            | by-cluster,by-frequency,by-hapmap,by-1000genomes |
| 9   | rs78489044               | 2                         | 21984596-21984596 | C to T            | by-1000genomes                                   |
| 10  | rs78703240               | 3                         | 21983190-21983190 | G to A            | by-frequency,by-1000genomes                      |
| 11  | rs73549518               | 3                         | 21983124-21983124 | C to T            | by-cluster,by-1000genomes                        |
| 12  | rs76691356               | 3                         | 21983120-21983120 | C (A) to G (P)    | by-frequency,by-1000genomes                      |
| 13  | rs56140348               | 4                         | 21982997-21982997 | A (L) to G (P)    | by-cluster,by-1000genomes                        |
| 14  | rs75362423               | 5                         | 21981170-21981170 | T (E) to C (G)    | by-cluster,by-frequency,by-1000genomes           |
| 15  | rs78939934               | 6                         | 21980352-21980352 | G to A            | by-1000genomes                                   |
| 16  | rs77689228               | 9                         | 21978734-21978734 | G to A            | by-frequency,by-1000genomes                      |
| 17  | rs58080661               | 9                         | 21978578-21978578 | A to G            | by-cluster,by-1000genomes                        |
| 18  | rs57903149               | 10                        | 21978469-21978469 | A to G            | by-cluster,by-1000genomes                        |
| 19  | rs76547188               | 10                        | 21978372-21978372 | C (G) to T (S)    | by-cluster,by-frequency,by-1000genomes           |
| 20  | rs11990451               | 11                        | 21977898-21977898 | G (S) to T (R)    | by-cluster,by-hapmap                             |
| 21  | rs11990450               | 11                        | 21977897-21977897 | G to A            | by-hapmap                                        |
| 22  | rs11990421               | 11                        | 21977860-21977860 | G (P) to A (L)    | by-cluster,by-hapmap                             |
| 23  | rs79077385               | 13                        | 21977390-21977390 | C (A) to G (P)    | by-frequency,by-1000genomes                      |
| 24  | rs7014851                | 14                        | 21976710-21976710 | T (T) to C (A)    | by-cluster,by-frequency                          |

Reference number, nucleotide positions within each exon, direction of change and validation source for 24 intraspecific coding polymorphisms used in neutrality tests. Direction of nucleotide changes are determined by using chimpanzee, orangutan and macaque as outgroup. The amino acid changes are given (bracket enclosed-fifth column) for non-synonymous nucleotide changes.
